# Supplementary material for: Characterizing urban butterfly populations: the case for purposive point-count surveys
Source: Springer Nature journal article supplement (doi:10.1007/s11252-019-00880-8), 2019-07-09
Supplement: MOESM1 [file 16914656]

**Appendix Supplementary Table**

**Table A1**. All butterfly species found using Pollard transects, purposive point counts, and random point counts in two urban habitat types during summer 2015 and 2016 surveys.

|  | Public gardens | | Garden  total | Restored prairie | | Prairie  total | Overall  total |
| --- | --- | --- | --- | --- | --- | --- | --- |
| Family/Species | 2015 | 2016 | 2015 | 2016 |
| Hesperiidae (skippers) |  |  |  |  |  |  |  |
| Common checkered-skipper *Pyrgus communis* | 0 | 1 | 1 | 0 | 0 | 0 | 1 |
| Crossline skipper *Polites origenes* | 0 | 4 | 4 | 0 | 0 | 0 | 4 |
| Delaware skipper *Anatrytone logan* | 0 | 3 | 3 | 0 | 5 | 5 | 8 |
| Fiery skipper *Hylephila phyleus* | 0 | 31 | 30 | 0 | 4 | 4 | 34 |
| Least skipper *Ancyloxypha numitor* | 1 | 10 | 11 | 0 | 10 | 10 | 21 |
| Peck's skipper *Polites peckius* | 1 | 14 | 15 | 1 | 14 | 15 | 30 |
| Sachem *Atalopedes campestris* | 0 | 39 | 39 | 0 | 9 | 9 | 47 |
| Silver-spotted skipper *Epargyreus clarus* | 1 | 16 | 17 | 0 | 8 | 8 | 25 |
| Tawny-edged skipper *Polites themistocles* | 5 | 9 | 14 | 2 | 6 | 8 | 22 |
| Wild indigo duskywing *Erynnis baptisiae* | 0 | 2 | 2 | 0 | 0 | 0 | 2 |
| Lycaenidae (gossamer winged) |  |  |  |  |  |  |  |
| Bronze copper *Lycaena hyllus* | 0 | 0 | 0 | 6 | 11 | 17 | 17 |
| Coral hairstreak *Satyrium titus* | 1 | 0 | 1 | 0 | 0 | 0 | 1 |
| Eastern tailed-blue *Everes comyntas* | 38 | 28 | 66 | 52 | 133 | 185 | 251 |
| Gray copper *Lycaena dione* | 1 | 0 | 1 | 2 | 1 | 3 | 4 |
| Spring azure *Celastrina ladon* | 5 | 4 | 9 | 4 | 6 | 10 | 19 |
| Nymphalidae (brush-footed) |  |  |  |  |  |  |  |
| American snout *Libytheana carinenta* | 5 | 2 | 7 | 0 | 1 | 1 | 8 |
| Common Buckeye *Junonia coenia* | 3 | 4 | 7 | 0 | 18 | 18 | 25 |
| Great spangled fritillary *Speyeria cybele* | 8 | 2 | 10 | 11 | 14 | 25 | 35 |
| Hackberry emperor *Asterocampa celtis* | 1 | 4 | 5 | 0 | 0 | 0 | 5 |
| **Table A1**. Continued |  |  |  |  |  |  |  |
|  | Public gardens | | Garden  total | Restored prairie | | Prairie  total | Overall  total |
| Species | 2015 | 2016 | 2015 | 2016 |
| Nymphalidae (brush footed, cont’d) |  |  |  |  |  |  |  |
| Little wood-satyr *Megisto cymela* | 0 | 0 | 0 | 0 | 2 | 2 | 2 |
| Monarch *Danaus plexippus* | 100 | 17 | 117 | 47 | 24 | 71 | 188 |
| Painted lady *Vanessa cardui* | 5 | 4 | 9 | 1 | 2 | 3 | 12 |
| Pearl crescent *Phyciodes tharos* | 3 | 2 | 5 | 35 | 34 | 69 | 74 |
| Question mark *Polygonia interrogationis* | 1 | 0 | 1 | 2 | 1 | 3 | 4 |
| Red admiral *Vanessa atalanta* | 69 | 18 | 87 | 46 | 32 | 78 | 165 |
| Red-spotted purple *Limenitis arthemis* | 0 | 1 | 1 | 0 | 0 | 0 | 1 |
| Regal fritillary *Speyeria idalia* | 1 | 0 | 1 | 0 | 0 | 0 | 1 |
| Silvery checkerspot *Chlosyne nycteis* | 0 | 0 | 0 | 0 | 1 | 1 | 1 |
| Viceroy *Limenitis archippus* | 1 | 0 | 1 | 7 | 10 | 17 | 18 |
| Papilionidae (swallowtails) |  |  |  |  |  |  |  |
| Black swallowtail *Papilio polyxenes* | 2 | 0 | 2 | 13 | 2 | 15 | 17 |
| Eastern tiger swallowtail *Papilio glaucus* | 3 | 3 | 6 | 8 | 8 | 16 | 22 |
| Giant swallowtail *Papilio cresphontes* | 0 | 0 | 0 | 0 | 2 | 2 | 2 |
| Pieridae (whites, sulphurs) |  |  |  |  |  |  |  |
| Cabbage white *Pieris rapae* | 211 | 295 | 506 | 79 | 71 | 150 | 656 |
| Checkered white *Pontia protodice* | 1 | 0 | 1 | 0 | 0 | 0 | 1 |
| Clouded sulphur *Colias philodice* | 38 | 18 | 56 | 126 | 147 | 273 | 329 |
| Cloudless sulphur *Phoebis sennae* | 1 | 0 | 1 | 0 | 0 | 0 | 1 |
| Little yellow *Eurema lisa* | 1 | 2 | 3 | 4 | 16 | 20 | 23 |
| Orange Sulphur *Colias eurytheme* | 14 | 5 | 19 | 24 | 42 | 66 | 85 |
| Unidentified | 15 | 2 | 17 | 35 | 12 | 47 | 64 |
| Total | 536 | 540 | 1076 | 505 | 646 | 1151 | 2227 |
